# Supplementary material for: Synthesis of hierarchical ZSM-5 using glucose as a templating precursor
Source: Royal Society of Chemistry journal article supplement (doi:10.1039/c3ta13904b), 2013-10-31
Supplement: c3ta13904b.pdf [file c3ta13904b.pdf]

## Synthesis of hierarchical ZSM-5 using glucose as templating precursor†

Devaki Nandan,<sup>ab</sup> Sandeep K Saxena<sup>b</sup> and Nagabhatla Viswanadham<sup>\*ab</sup>

<sup>a</sup>AcSIR-Indian Institute of Petroleum Dehradun-248005 (Uttarakhand), India.

<sup>b</sup>Catalysis and Conversion Processes Division, CSIR-Indian Institute of Petroleum, Dehradun-248005, India, Fax: 91-135-2525702, Tel: 91-135-2525856, E-mail: [nvish@iip.res.in](mailto:nvish@iip.res.in)

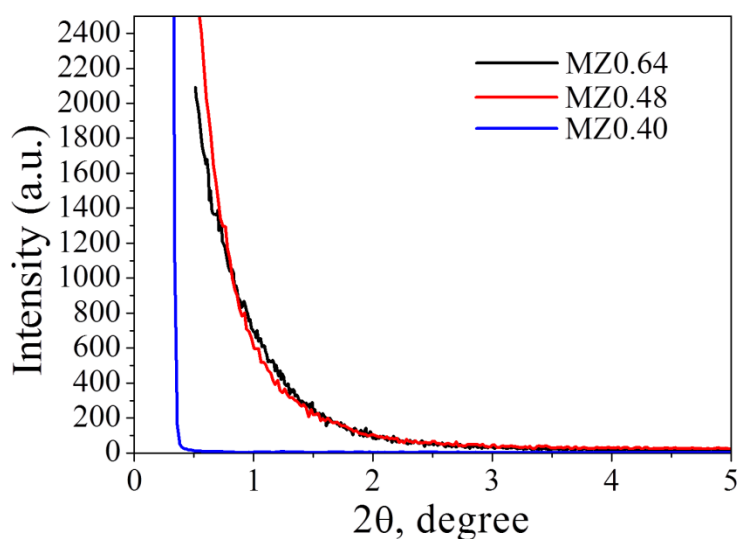

**Fig. S1** low angle XRD patterns of synthesized samples
